# Supplementary material
Source: PubMed Central journal article supplement (PMC7535629)
Supplement: mmc1.pdf [file mmc1.pdf]

# THE LANCET Neurology

## Supplementary appendix

This appendix formed part of the original submission and has been peer reviewed.  
We post it as supplied by the authors.

Supplement to: Matschke J, Lütgehetmann M, Hagel C, et al. Neuropathology of patients with COVID-19 in Germany: a post-mortem case series. *Lancet Neurol* 2020; published online Oct 5. [https://doi.org/10.1016/S1474-4422\(20\)30308-2](https://doi.org/10.1016/S1474-4422(20)30308-2).

# Neuropathology of SARS-CoV-2: a post mortem case series

Jakob Matschke<sup>1</sup>, Marc Lütgehetmann<sup>2</sup>, Christian Hagel<sup>1</sup>, Jan P. Sperhake<sup>3</sup>, Ann Sophie Schröder<sup>3</sup>, Caroline Edler<sup>3</sup>, Herbert Mushumba<sup>3</sup>, Antonia Fitzek<sup>3</sup>, Lena Allweiss<sup>4</sup>, Maura Dandri<sup>4,7</sup>, Matthias Dottermusch<sup>1</sup>, Axel Heinemann<sup>3</sup>, Susanne Pfefferle<sup>2</sup>, Marius Schwabenland<sup>9</sup>, Daniel Sumner Magruder<sup>5</sup>, Stefan Bonn<sup>5;8</sup>, Marco Prinz<sup>9</sup>, Christian Gerloff<sup>6</sup>, Klaus Püschel<sup>3</sup>, Susanne Krasemann<sup>1</sup>, Martin Aepfelbacher<sup>2</sup> and Markus Glatzel<sup>1</sup>,

<sup>1</sup>Institute of Neuropathology, University Medical Center Hamburg-Eppendorf, Hamburg, Germany

<sup>2</sup>Institute of Medical Microbiology, Virology and Hygiene, University Medical Center Hamburg-Eppendorf, Hamburg, Germany

<sup>3</sup>Institute of Legal Medicine, University Medical Center Hamburg-Eppendorf, Hamburg, Germany

<sup>4</sup>I. Department of Medicine, University Medical Center Hamburg-Eppendorf, Hamburg, Germany

<sup>5</sup>Institute of Medical Systems Biology, University Medical Center Hamburg-Eppendorf, Hamburg, Germany.

<sup>6</sup>Department of Neurology, University Medical Center Hamburg-Eppendorf, Hamburg, Germany

<sup>7</sup>German Center for Infection Research, Partner Site Hamburg-Borstel-Lübeck-Riems, Germany

<sup>8</sup>German Center for Neurodegenerative Diseases, Tuebingen, Germany.

<sup>9</sup>Institute of Neuropathology, University of Freiburg, Freiburg, Germany

## Supplementary data

### Contents:

**Page 2: Suppl. Fig 1.** Establishment of SARS-CoV-2 staining on paraffin embedded cells

**Page 3: Suppl. Fig 2.** Examples of immunostaining for CD8 in the lower brainstem

**Page 4: Suppl. Fig 3.** Staining of SARS-CoV-2 viral proteins in cranial nerves

**Page 5: Suppl. Table 1:** Histopathological analysis of microgliosis based on Iba1-immunoreactivity.

**Suppl. Fig 1.** Establishment of SARS-CoV-2 staining on paraffin embedded cells  
Vero-cells were either infected with SARS-CoV-2 (Hamburg isolate) or mock infected, fixed in formalin, and embedded into paraffin blocks. Paraffin sections were cut and stained. Representative images of virus protein detection with anti-Spike (S2 subunit) or two different anti-nucleoprotein antibodies show highly specific staining in virus infected cells only. As expected, anti-Spike antibody displayed a subcellular staining pattern that is distinct from those of both nucleoprotein antibodies. Mock infected cells show no or only very weak background staining. Scale bar: 50  $\mu$ m.

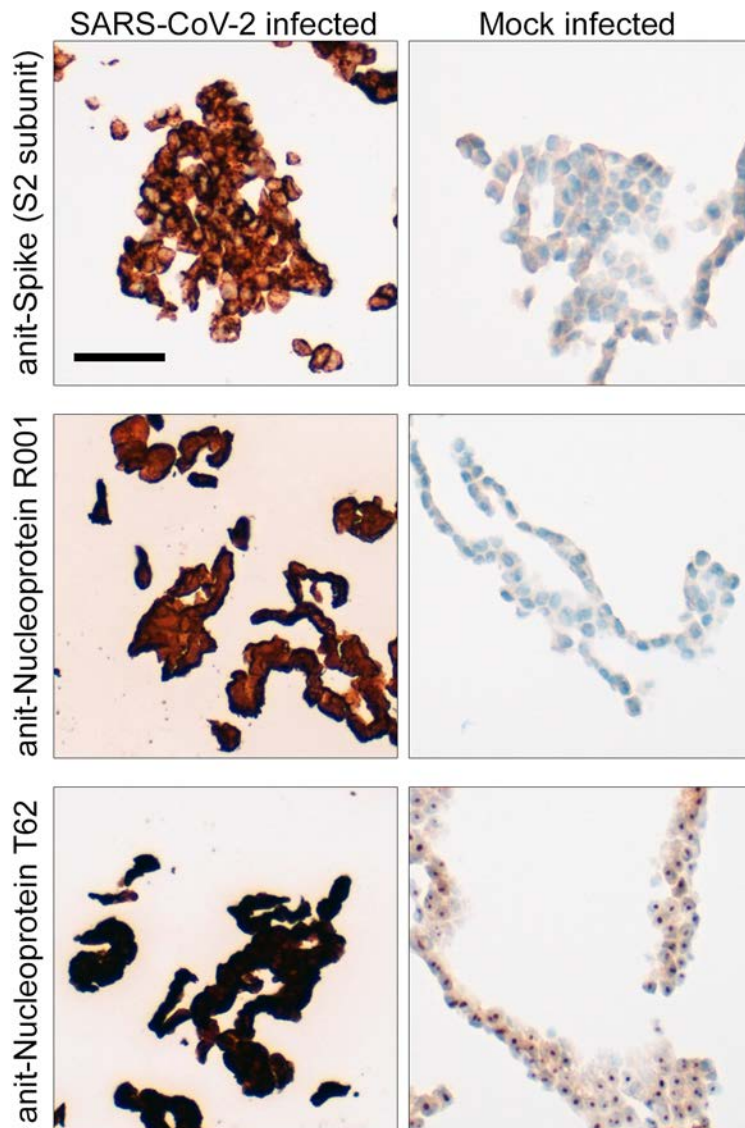

**Suppl. Fig 2.** Examples of immunostaining for CD8 in the lower brainstem (a: 1+, b: 2+, c: 3+) and GFAP in the frontal cortex (d: 1+ (slight: occasional reactive astrocytes), e: 2+ (moderate: scattered confluent reactive astrocytes), f: 3+ (severe: numerous reactive astrocytes) in patients with fatal SARS-CoV-2-infection (COVID-19). Scale bar: 100  $\mu$ m

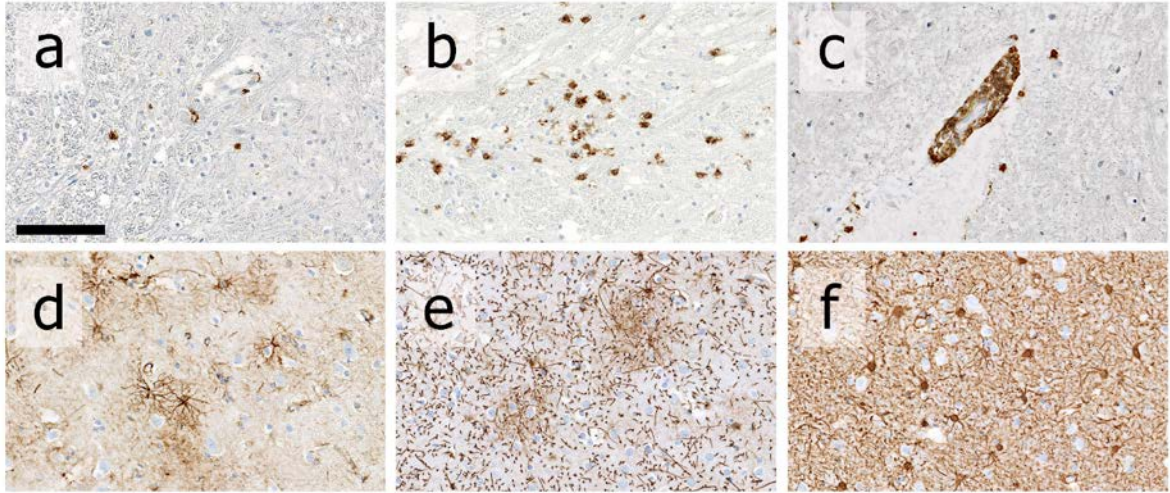

**Suppl. Fig 3.** Staining of SARS-CoV-2 viral proteins in cranial nerves could be detected in two cases of this study. A) Spike protein was detected in one case; Scale bar: 50 $\mu$ m and B) nucleoprotein in another; Scale bar: 100 $\mu$ m. Brain macrophages/microglia as detected by Iba1 did not co-localize with positive signal in consecutive sections. Secondary antibody only control did not show relevant background signal.

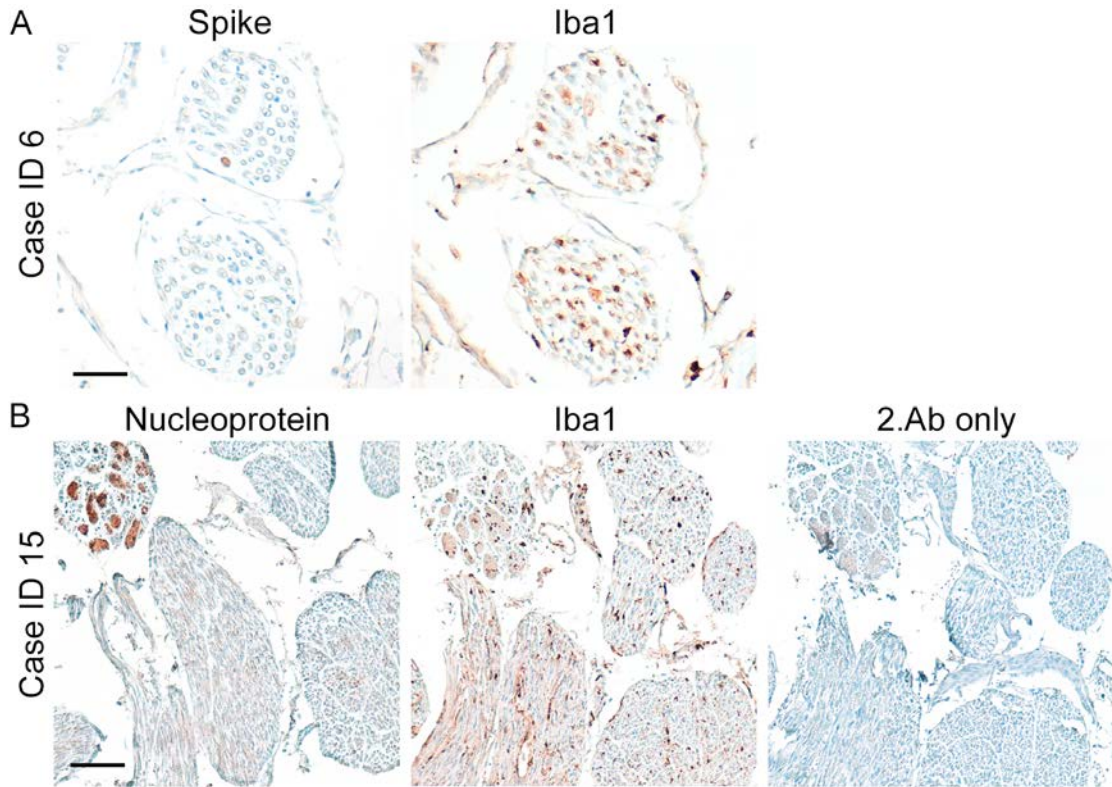

**Suppl. Table 1:**

Histopathological analysis of microgliosis based on Iba1-immunoreactivity.

| ID | upper medulla          |
|----|------------------------|
| 1  | severe                 |
| 2  | severe                 |
| 3  | n.d.                   |
| 4  | n.d.                   |
| 5  | severe                 |
| 6  | moderate               |
| 7  | severe                 |
| 8  | severe                 |
| 9  | technical issues: n.d. |
| 10 | technical issues: n.d. |
| 11 | moderate / severe      |
| 12 | severe                 |
| 13 | slight                 |
| 14 | moderate               |
| 15 | n.d.                   |
| 16 | severe                 |
| 17 | moderate               |
| 18 | severe                 |
| 19 | moderate               |
| 20 | severe                 |
| 21 | severe                 |
| 22 | slight                 |
| 23 | none                   |
| 24 | severe                 |
| 25 | severe                 |
| 26 | none                   |
| 27 | severe                 |
| 28 | slight                 |
| 29 | severe                 |
| 30 | moderate               |
| 31 | severe                 |
| 32 | moderate               |
| 33 | moderate               |
| 34 | severe                 |
